# Supplementary material for: Inorganic Polyphosphate Activates the NLRP3 Inflammasome Signaling Pathway via TRPM8 and Promotes the Epithelial to Mesenchymal Transition in Colorectal Cancer
Source: Preprints.org preprint supplement (doi:10.20944/preprints202410.2290.v1), 2024-10-30
Supplement: Supplementary file 2 [file supplementary]

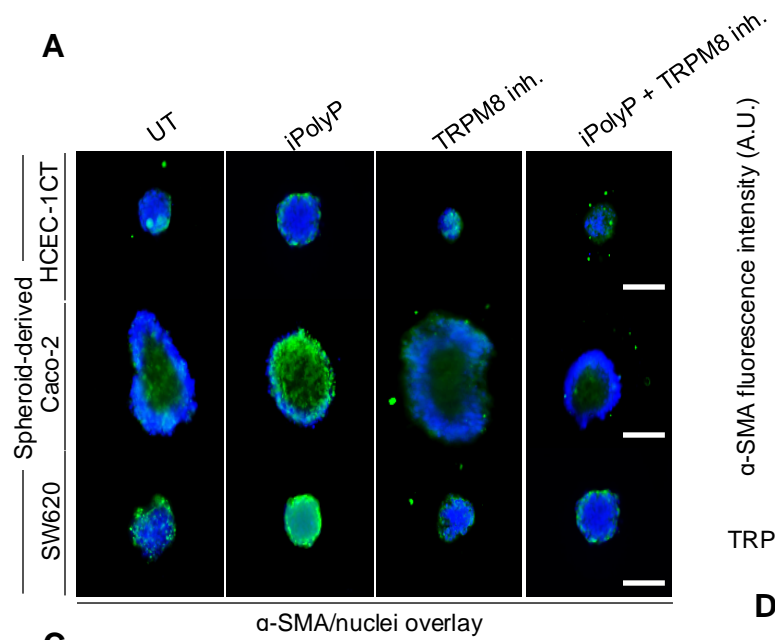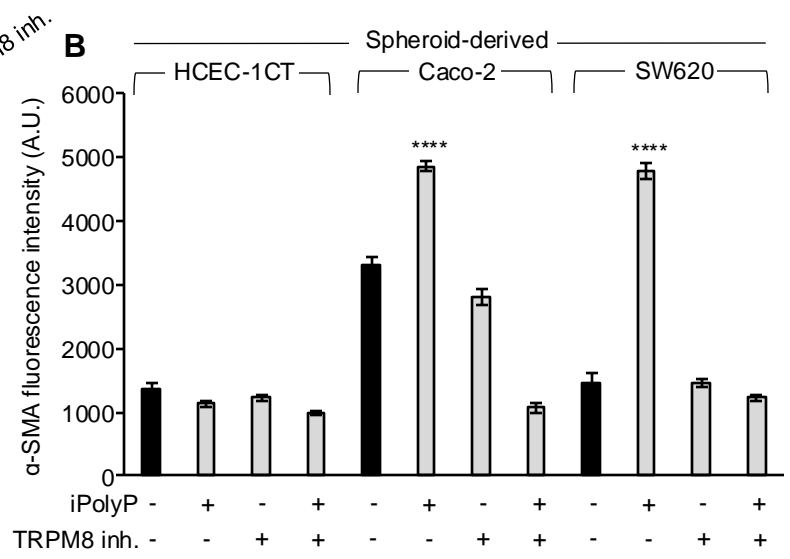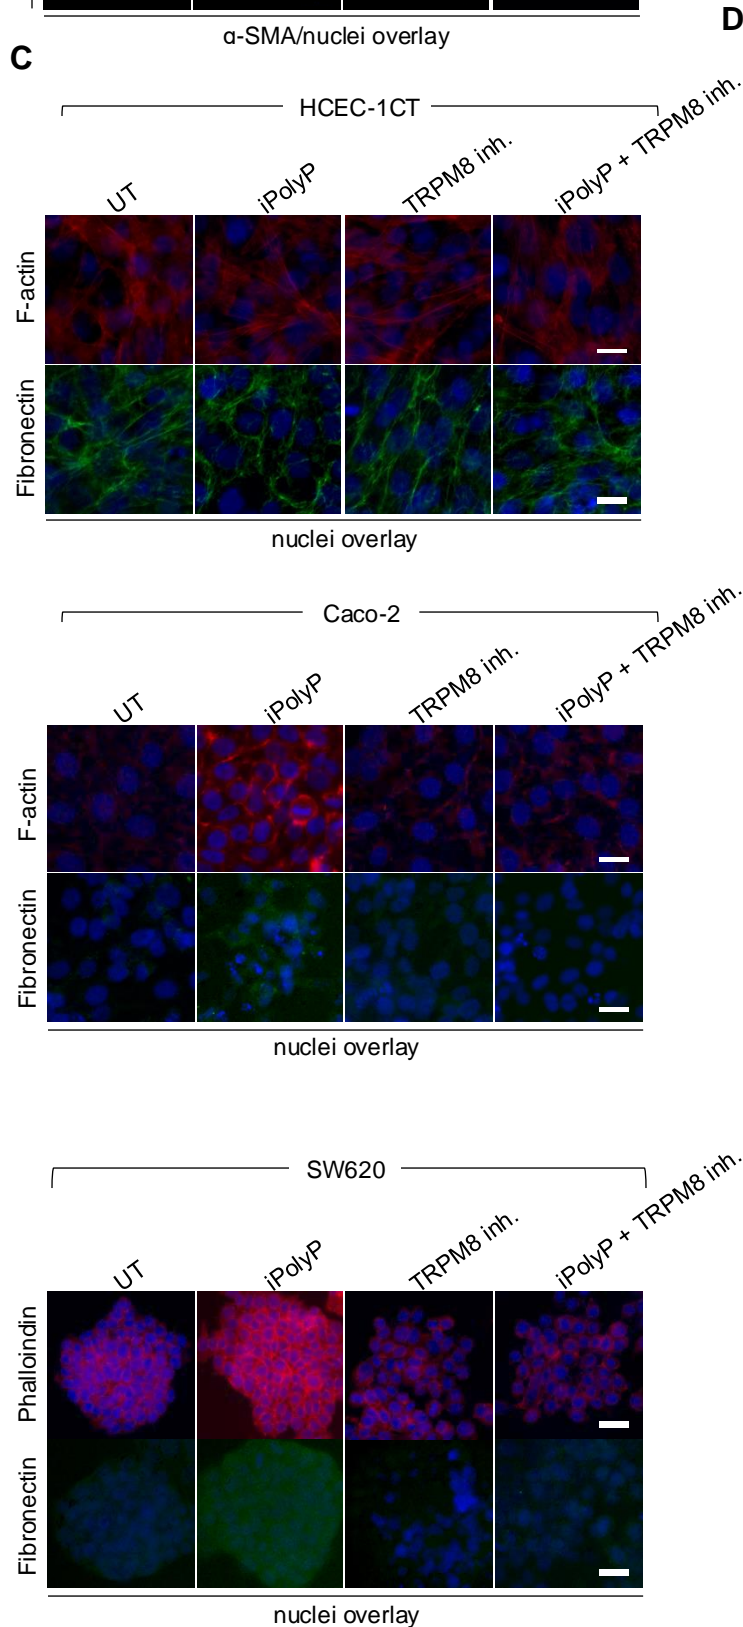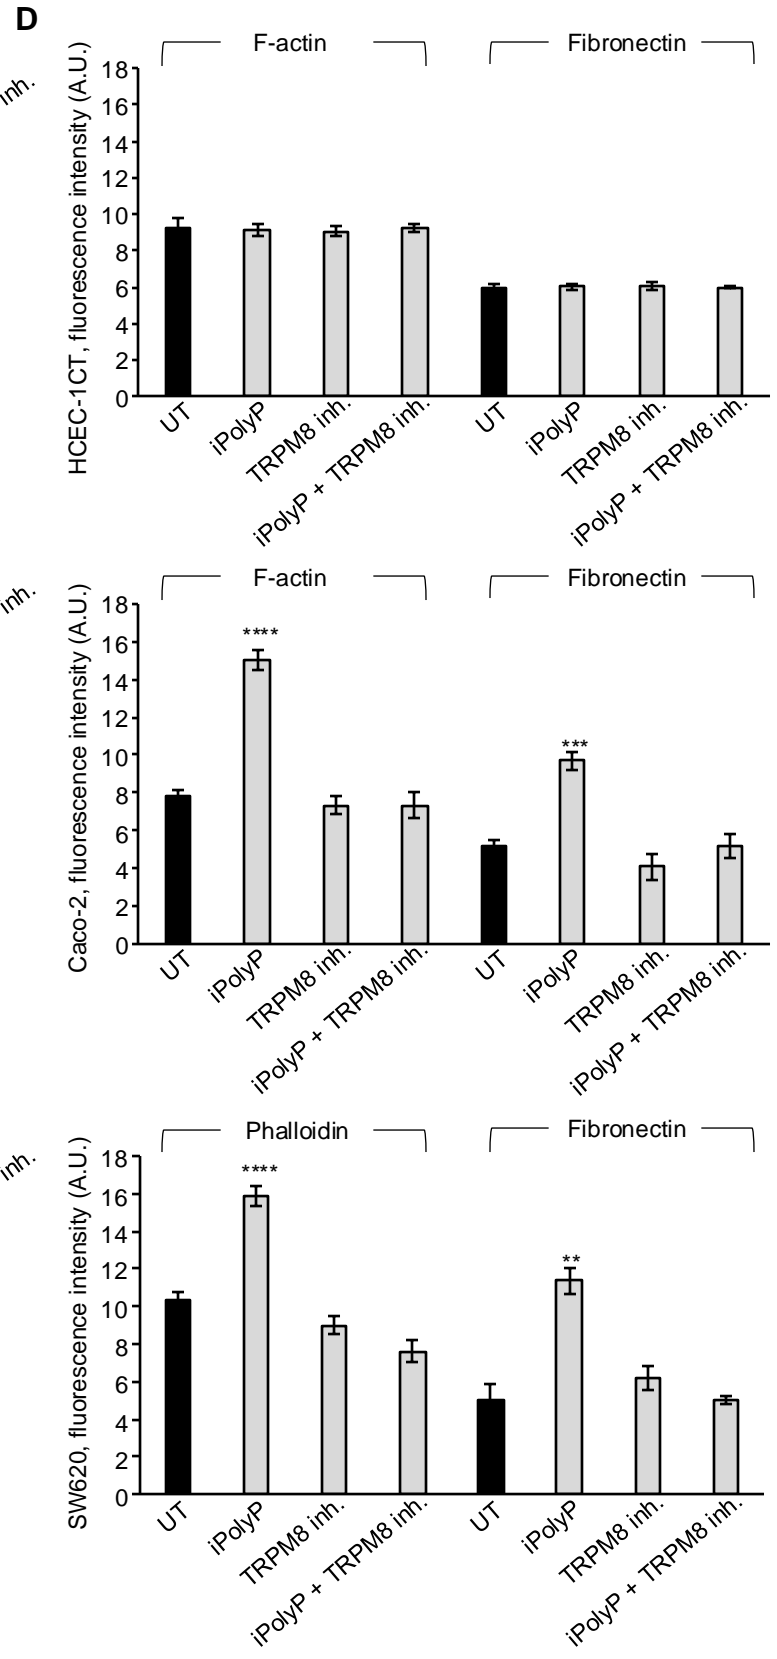

A

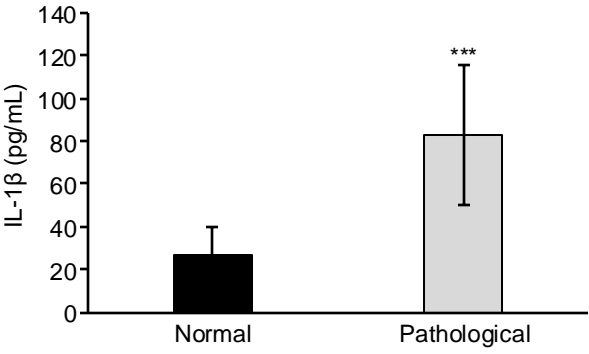

**A**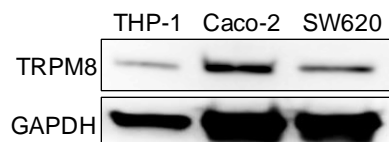**B**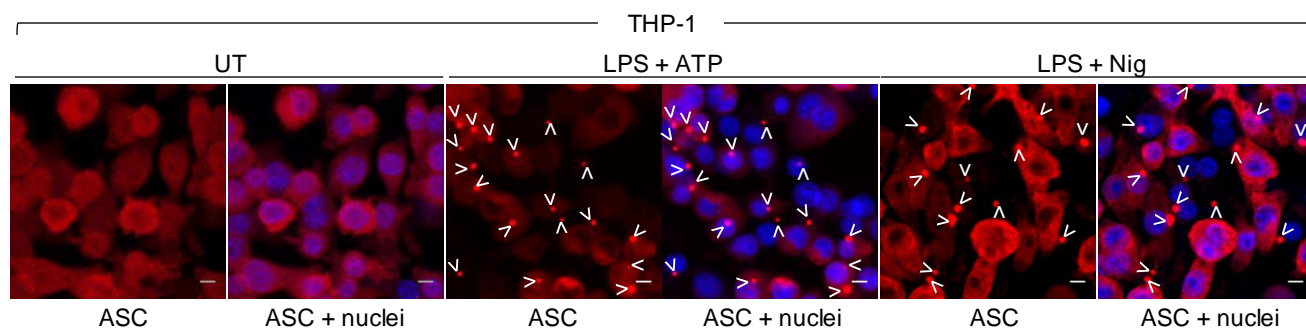**C**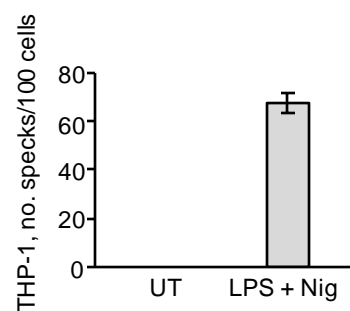**D**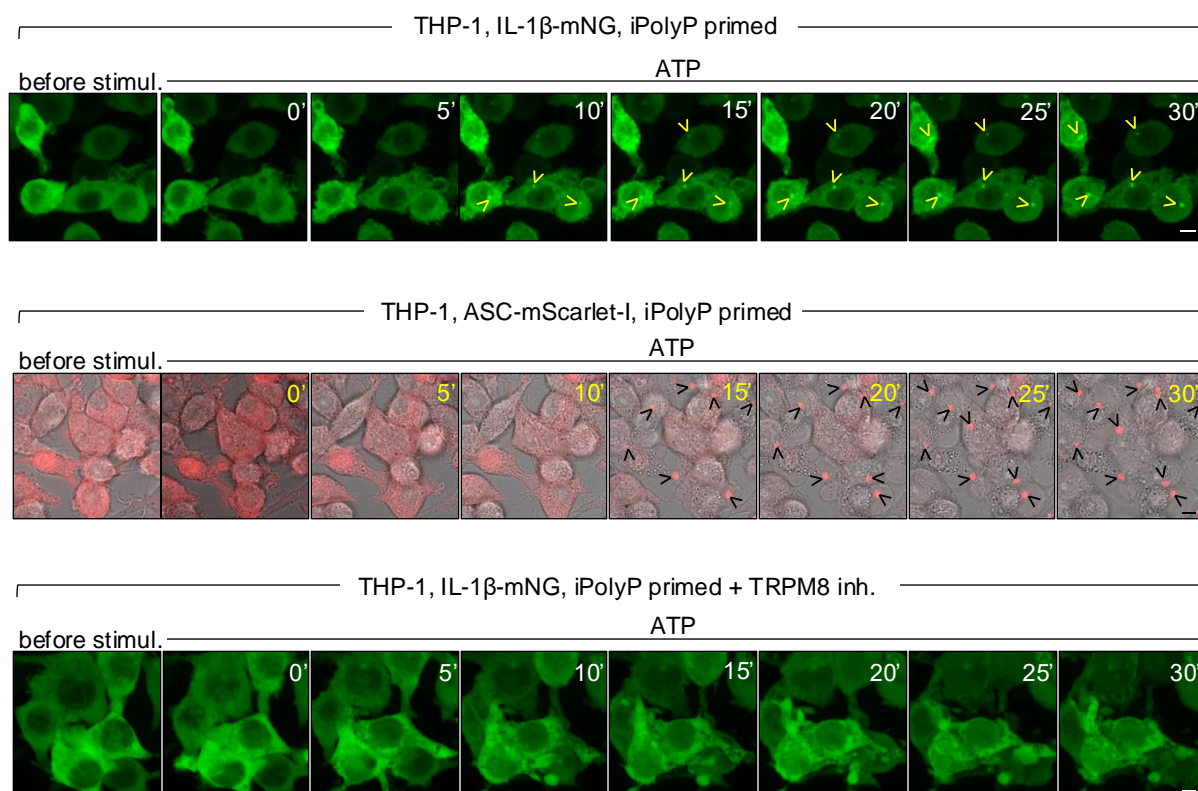

## Supplementary Figure legend

**Supplementary Figure S1: iPolyP induces  $\alpha$ -SMA expression and fosters Caco-2- and SW620-derived spheroids growth.** **A.** Immunofluorescence images performed on HCEC-1CT- (upper panel), Caco-2- (middle panel) and SW620-derived (lower panel) spheroids for  $\alpha$ -SMA detection upon treatment with iPolyP, TRPM8 inhibitor or both for 48 hours. Scale bar 100  $\mu$ m. **B.** Quantification relative to panel **A**. Fold changes versus control, untreated (UT). Statistical analysis performed by Student's t-test (\*\*\*\*  $p < 0.0001$ ). **C.** Immunofluorescence images showing F-actin and Fibronectin level performed on HCEC-1CT (upper panel), Caco-2 (middle panel) and SW620 (lower panel) cell line upon treatment with iPolyP, TRPM8 inhibitor or both. **D.** Quantification relative to panel **C**. Fold changes versus control; untreated (UT). Statistical analysis performed by Student's t-test (\*\*\*\*  $p < 0.0001$ , \*\*  $p < 0.01$ ). Cells were treated with iPolyP and TRPM8 inhibitor for 48 hours.

**Supplementary Figure S2: A. CRC patients display elevated level of circulating IL-1 $\beta$ .** Evaluation of plasma-derived IL-1 $\beta$  performed by ELISA on normal (n = 10) and CRC subjects (n = 10). Fold changes of Pathological subjects versus Normal individuals. Statistical analysis performed by Student's t-test (\*\*  $p < 0.01$ , \*\*\*  $p < 0.001$ ).

**Supplementary Figure S3: iPolyP + ATP trigger the NLRP3 inflammasome, mimicking the canonical activation mediated by LPS and ATP.** **A.** Cellular extracts from THP-1 monocyte, treated with LPS, iPolyP or iPolyP + TRPM8 inhibitor for 4 hours were analyzed by immunoblotting against pro-IL-1 $\beta$  and TRPM8, normalized on GAPDH. **B.** Representative confocal micrographs on THP-1 cells treated with LPS (4 hours) + ATP (30 minutes) or LPS (4 hours) + Nigericin (30 minutes), used as positive control, untreated (UT). White angle brackets indicate the presence of ASC specks. Scale bar 10  $\mu$ m. Images are representative of three independent experiments. **C.** Quantification of the number of ASC specks, relative to panel **B**. **D.** Upper panel, confocal micrographs of time-lapse confocal microscopy performed on THP-1 cells, stably expressing IL-1 $\beta$ -mNG, upon treatment with iPolyP (4 hours) + ATP (30 minutes). Yellow angle brackets indicate ASC specks; Middle panel, time-lapse experiment in bright-field merged with fluorescence channel on THP-1 cell, stably expressing ASC-mRuby3, upon treatment with iPolyP (4 hours) + ATP (30 minutes). Black angle brackets indicate ASC-mScarlet-I specks; Lower panel, time-lapse confocal microscopy performed on THP-1 cells, stably expressing IL-1 $\beta$ -mNG, upon treatment with iPolyP (4 hours) + ATP (30 minutes) + TRPM8 inhibitor (4 hours). Scale bar 10  $\mu$ m. Data are presented as mean  $\pm$  SD for triplicate wells from three independent experiments.

**Supplementary Videos: Time-lapse confocal microscopy on THP-1 cells treated with iPolyP.** **Supplementary Video 1:** THP-1, IL-1 $\beta$ -mNG, iPolyP (4 hours) + ATP (30 minutes); Scale bar = 10  $\mu$ m. **Supplementary Video 2:** THP-1 ASC-mScarlet-I, iPolyP (4 hours) + ATP (30 minutes); Scale bar = 5  $\mu$ m. **Supplementary Video 3:** THP-1, IL-1 $\beta$ -mNG, iPolyP (4 hours) + ATP (30 minutes) + TRPM8 inhibitor (4 hours); Scale bar 10  $\mu$ m.
